# Supplementary material for: A review on the role of functional limitations on evacuation performance using the International Classification of Functioning, Disability and Health
Source: Springer Nature journal article supplement (doi:10.1007/s10694-020-01034-5), 2020-09-14
Supplement: MOESM1 [file 18378868]

## Sheet: Sheet1
	Author(s)	Year	Title	Publication	Emergency type	Aim	Location	Methodology	Type of study	Extracted data	Activity in ICF table	Number of participants	Age	Limitation (referred to in paper)	Assistive devices/presence of assistant	Notes
1	Huey et al.	1996	Audible performance of smoke alarm sounds	International Journal of Industrial Ergonomics	Fire	Analysis of a variety of alternative sounds for "age sensitive" smoke alarms	USA	Experiment	Quantitative	Connection between sound frequencies and response of people with hearing impairment to sound alarms	Hearing alarm	37	65 and older	Hearing	Not available
2	Kecklund et al.	2012	How Do People with Disabilities Consider Fire Safety and Evacuation Possibilities in Historical Buildings?—A Swedish Case Study	Fire Technology, journal	Fire	Understanding how evacuation safety in historical buildings can be improved to meet the needs of people with various disabilities	Sweden	Interviews	Qualitative	Impact of different impairments and environment design on evacuation performance	Hearing alarm, Orientation, Finding architectural elements, Using stairs, Opening doors	20	All:20-70; 30-60 non-wheelchair users; 20-60 wheelchair users; 20-60 visual; 40-70 hearing	Visual, hearing, mobility	Wheelchair and non-assisted
3	Proulx, G.	2002	Evacuation Planning for Occupants with Disability	Internal Report No. 843 Fire Risk Management Program Institute for Research in Construction National Research Council Canada	Fire	Discussion on strategies for evacuation of disabled	North America and referencing to Canadian fire safety codes and Canadian data on prevalence of disabilities	/	Qualitative	Statistics, strategies, overview of what has been researched	Hearing alarm	Not available	Not stated. Referenced to older population	Visual, hearing, mobility, cognitive	Wheelchair and non-assisted
4	Moinuddin, Bruck and Shi	2017	An experimental study on timely activation of smoke alarms and their effective notification in typical residential buildings	Fire Safety Journal	Fire	Testing smoke alarm sound level and alarm activation level	Australia	Experiment	Quantitative	Connection between sound frequencies and response of people with hearing impairment to sound alarms	Hearing alarm	Not available	Older adults	Hearing	Not available
5	Kuligowski, E.D.	2016	Human Behaviour in Fire, chapter	SFPE Handbook of Fire Protection Engineering	Fire	Explaining the aspects of the human behaviour in fire	Not available	/	Qualitative	Data on emergency cues	Seeing emergency cues	Not available	Not available	Visual	Not available
6	Boyce, K.E. et al.	1999	Toward the Characterization of Building Occupancies for Fire Safety Engineering: Capability of People wit Disabilities to Read and Locate Exit Signs	Fire Technology, journal	Fire	Exploring egress capabilities of people with disabilities - the ability of disabled to locate and read signs (non-illuminated, internally illuminated and LED signs)	UK (Northern Ireland)	Experiment	Quantitative	Data on impact of different way-finding systems on ability of visually impaired people to locating exit signs	Locating exit signs	118 (25 with visual impairments)	Not available	Visual	Not available
7	Sørensen et al.	2015	Evacuation of people with visual impairments	PhD thesis, Technical University of Denmark	Fire	Collecting the data about evacuation of vulnerable groups, especially blind and visually impaired - interaction with the built environment, walking speeds in office buildings, industrial building and a tunnel	Denmark, USA	Experiment and interviews	Mixed	Data on impact of built environment on potentially hard-to-perform evacuation activities	Locating exit signs, Using stairs	148 (54 with visual impairments)	Visually impaired - 10 - over 65 (17 participants of age 10-19)	Visual, mobility (3), cognitive (4).	Dog, cane, assistant
8	Passini and Proulx	1988	Wayfinding without Vision: An Experiment with Congenitally Totally Blind People	Environment and Behaviour, journal	Fire	Analysis of congenitally totally blind people decision making during evacuation, identifying way-finding issues, as well as the ability to represent the evacuation route by applying cognitive mapping	Canada	Experiment, questionnaire	Mixed	Data on way-finding systems, spatial orientation and interaction between visually impaired and built environment and the impact on evacuation	Locating exit signs, Orientation, Maintaining direction, Finding architectural elements	15	18-56	Visual	Not available
9	Boyce, K.E. et al.	1999	Toward the Characterization of Building Occupancies for Fire Safety Engineering: Prevalence, Type, and Mobility of Disabled People	Fire Technology, journal	Fire	Providing data on egress capabilities of disabled (statistical data on prevalence, impact on egress)	UK	Not available	Qualitative	Statistical data on prevalence of different functional limitations and their impact on egress (adults)	Locating exit signs, Using stairs, Opening doors	14,874 (children) and 199,868 (adults)	Children and adults	Hearing, visual, mobility, cognitive	Wheelchair and non-assisted
10	Passini et al.	2000	Wayfinding in a nursing home for advanced dementia of the Alzheimer's type	Environment and Behaviour	Fire	Analysing the impact of dementia on wayfinding in order to generate design criteria to facilitate wayfinding for advanced Alzheimer's patients	Canada	Experiment and interviews	Mixed	Statistical data on increase of number of old people and prevalence of dementia	Locating exit signs, Orientation, Using evacuation elevators	6	76-94	Cognitive	Assisted and non-assisted wayfinding
11	Passini et al.	1995	Wayfinding in dementia of the Alzheimer type: Planning abilities	Journal of Clinical and Experimental Neuropsychology	Fire	Investigating the decision plans for solving wayfinding problems in unfamiliar settings	Canada	Experiment and interviews	Mixed	Data on capability of people with dementia of Alzheimer type to make decision and orientate themselves	Orientation	14	mean - 72.07	Cognitive	Not available
12	Proulx, G.	1995	Evacuation Time and Movement in Apartment Buildings	Fire Safety Journal	Fire	Observing the evacuation time and occupant movement in mixed occupancy buildings	Canada	Experiment and interviews	Mixed	Impairments vs. built environment, common evacuation strategies for people with functional limitations	Communication with others/rescue service; Using stairs	average 150	20-over 65	Various, but no mobility impaired	No wheelchair users
13	Park, Yoon and Choi	2019	Leave no one behind: Experiences of persons with disability after the 2017 Pohang earthquake in South Korea	International Journal of Disaster Risk Reduction	Earthquake	Understanding the impact of earthquakes on persons with disabilities and to propose policies that will enhance the resilience of vulnerable groups during and after disasters	South Korea	Interpretative description, face to face and semi structured interviews	Qualitative	Data on speech impairments (1 person)	Communication with others/rescue services	4 people with functional limitations, 1 activist, 3 care givers, 2 public officers	30-50	Muscle disorder, physical x2, speech and hearing	Wheelchair
14	Averill et al.	2005	Federal Building and Fire Safety Investigation of the World Trade Center Disaster: Occupant Behavior, Egress, and Emergency Communications	NIST (National Institute od Standards and Technology) report	Terrorist attack	Analysis of the evacuation of the World Trade Center towers, estimating the evacuation time for different scenarios using simulation models	USA	Interviews	Mixed	Interviews, time to reach the stairwell, stairwell evacuation time	Using stairs	803 phone interviews, 225 face to face interviews ,6 focus groups	Not available	Mobility, Visual	Wheelchair
15	Kuligowski et al.	2013	Stair Evacuation of Older Adults and People with Mobility Impairments	Fire Safety Journal	Flood	Collection of data on movement speeds and behvaiour of mobility impaired	USA	Experiment	Quantitative	Way-finding aid, the impact of mobility limitations on stair evacuation, assisted evacuation	Using stairs	45	Older adults	Mobility	Assisted (cane, stair descent devices, other occupants or staff, firefighters) and non-assisted
16	K. Butler et al.	2017	Perspectives of Occupants with Mobility Impairments on Evacuation Methods for Use during Fire Emergencies	Fire Safety Journal	Fire	Understanding of how building occupants with mobility impairments evacuate multi-story buildings and to identify perspectives on the use of elevators during fire	USA	Face-to-face interviews	Qualitative	Way-finding aid, stair evacuation, accessibility of evacuation elevators for people with upper extremities limitations	Using stairs, Using evacuation elevators	51	mid-20s to over 60 (10:26-35, 14:36-45, 11:46-55, 16: over 56)	Mobility, upper extremities	Wheelchair, crutches, cane, rollator/walker, scooter, other
17	Spearpoint and MacLennan	2012	The effect of an ageing and less fit population on the ability of people to egress buildings	Safety Science	Fire	Review of statistical data on age, obesity, walking speed and their possible effects on evacuation time	New Zealand and Canada	/	Quantitative	Impact of obesity and age on egress activities	Using stairs, Moving on horizontal, Moving on incline, Traversing 90 degree bend	Not available	Statistical data on occupants - children to older population (85+)	Mobility	Wheelchair
18	Boyce et al.	1999	Toward the Characterization of Building Occupancies for Fire Safety Engineering: Capabilities of Disabled People Moving Horizontally and on an Incline	Fire Technology, journal	Fire	To provide data for designers and modellers on egress capabilities of disabled people with different type of severity, needed assistance and age	UK (Northern Ireland)	Experiment	Quantitative	Impact of mobility limitations on using stairs and data on particular activities related to moving on incline and horizontal surfaces	Using stairs, Moving on horizontal, Moving on incline, Traversing 90 degree bend	155 (121 moving without help, 34 needed help)	20-85	Mobility (and reaching and stretching)	Assisted (wheelchair) and non-assisted
19	Geoerg, Polzin, Schumann, Holl, Hofmann	2018	Small-Scale Studies on Evacuation Characteristics of Pedestrians with Physical, Mental or Age-Related Disabilities	Journal of Physics: Conference Series 1107:072006	Fire	To extend and improve an engineering database for pedestrian movement of people with functional limitations, considering their walking speeds and assisting devices preparation time in pre-evacuation and movement phase	Germany	Experiment	Quantitative	Impact of assisting devices preparation time on evacuation of mobility and cognitive impaired and egress activities related to it	Moving to wheelchair, Moving to escape mattress, Moving to stair descent devices	10	21-71	Mobility, cognitive	Wheelchair, escape mattress, evacuation chair
20	Ronchi et al.	2015	Ascending Evacuation in Long Stairways: Physical Exertion, Walking Speed and Behaviour	Report no. 3192. Lund, Sweden: Department of Fire Safety Engineering, Lund University	Fire	Investigation of the effects of fatigue on walking speeds, physiological performance and behaviours in case of long ascending evacuation in order to provide information for improving fire safety design and evacuation modelling	Sweden	Experiment	Quantitative	Impact of exertion on egress activities	Using stairs	4 experiments, total number of participants: 135 individual participants in individual experiments and 62 in group experiments	below and above 40	Mobility (issues related to stamina/breathing/fatigue)	Non-assisted
21	Wickramasinghe et al.	2017	Sequence Learning with Passive RFID Sensors for Real-Time Bed-Egress Recognition in Older People	IEEE Journal of Biomedical and Health Informatics	Not available	Investigation of the use of a batteryless radio-frequency identification (RFID) tag response to analyze bed-egress movements in order to prevent falls during this activity	Australia	Experiment	Quantitative	Data on set of movements made in order to perform getting out of bed egress activity	Getting out of bed	14 healthy participants	66-86	Mobility	Not available
22	Boyce et al.	1999	Toward the Characterization of Building Occupancies for Fire Safe Engineering: Capability of Disabled People to Negotiate Doors	Fire Technology, journal	Fire	To provide data on egress capabilities of impaired population. It presents the results of an experiment conducted to determine the ability of people with disabilities to negotiate doors with different closing forces	UK (Northern Ireland)	Experiment	Quantitative	Environmental barriers for egress activities and their impact on evacuation of population with functional limitations	Opening doors	113	25-85	Mobility, upper extremities	Crutch, walking stick, walking frame, non-assisted
23	Hashemi	2018	Emergency Evacuation of People with Disabilities: A Survey of Drills, Simulations, and Accessibility	Cogent Engineering	General	To highlight the major findings in the literature regarding emergency evacuation of people with disabilities and highlighting the related shortcomings and gaps for future research.	Not available	Simulations and review of literature	Qualitative	Data on elevator accessibility and its effect on evacuation of disabled	Using evacuation elevators	/	/	Mobility	Wheelchair (assisted and non-assisted)
24	Mc Connell and Boyce	2015	Refuge areas and vertical evacuation of multistory buildings: the end users’ perspectives	Fire and Materials	Fire	To determine the level of knowledge and concerns of people with functional limitations about refuge areas and their preparedness to use them	UK	Interviews (questionnaire)	Qualitative	Data on occupants' concerns and understanding of need to use evacuation elevators during evacuation	Using evacuation elevators	116 + 12 participants in the focus group	19- 70+	Mobility	Wheelchair and non-assisted
25	Kesler et al.	2017	Egress Efficacy of Persons with Multiple Sclerosis During Simulated Evacuations	Fire Technology, journal	Fire	To characterize the impact of a disorder (multiple sclerosis) on evacuation and to provide movement data to improve evacuee safety	USA	Experiments	Quantitative	The impact of multiple sclerosis on performance of different evacuation activities in different environmental setting considering age and disease progression	Moving on horizontal, Moving on incline, Traversing 90 degree bend, Opening doors	15	Mean: 54.3	Mobility	Non-assisted, wheelchair
